# Supplementary material
Source: PubMed Central journal article supplement (PMC6083246)
Supplement: rspb20181165supp1.pdf [file rspb20181165supp1.pdf]

## Supplemental Data Items

**Figure S1.** A map of *D. melanogaster* sampling locations in Australia. The sampling sites are indicated by crosses and location information is provided next to the mark.

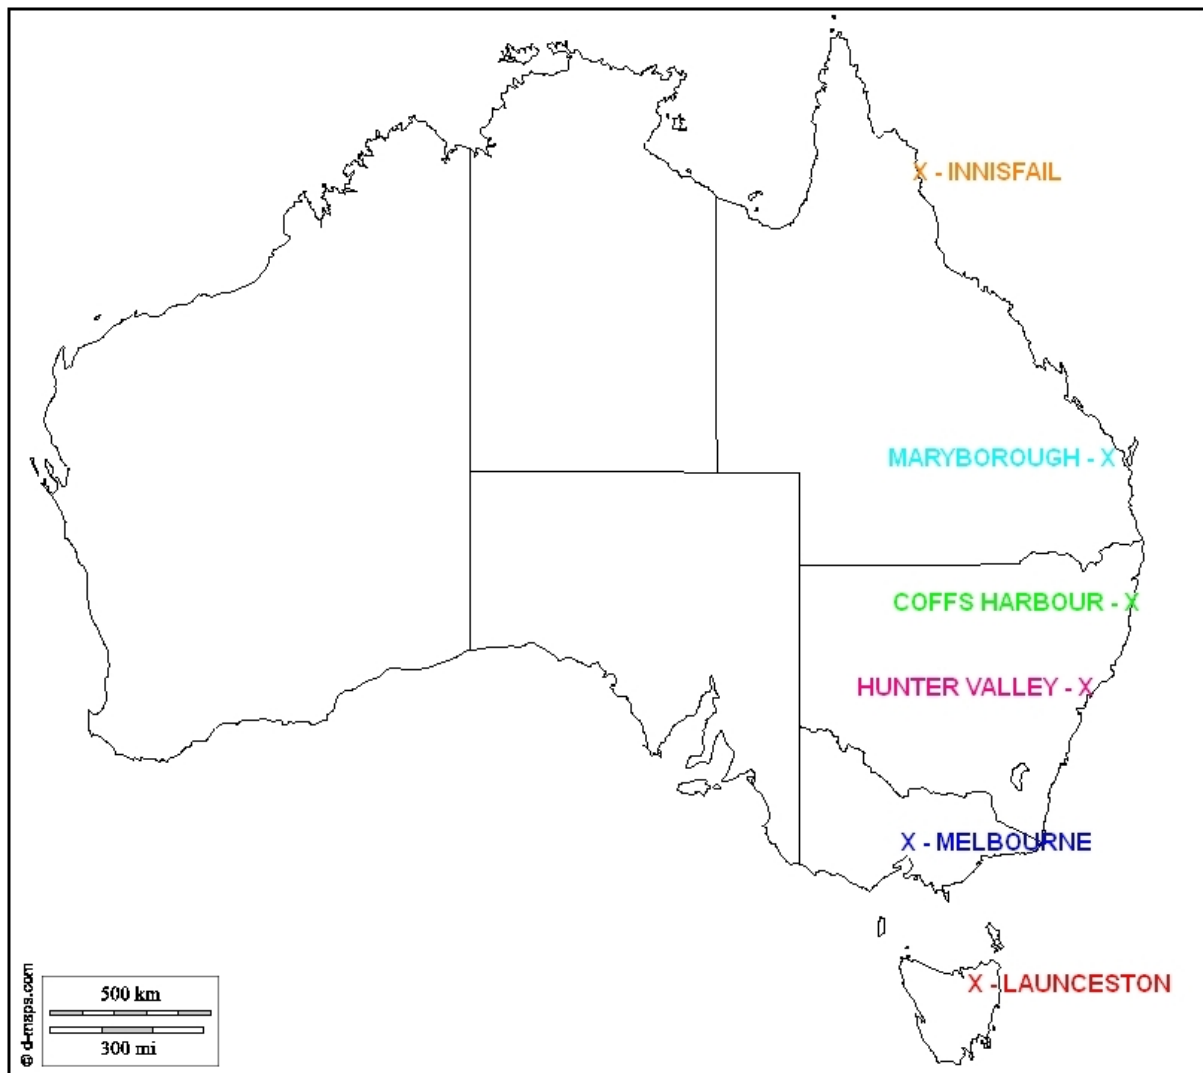

**Figure S2.** Genetic background of *wMel* strain used in this study. The alignment of five genes (i.e. *rplF*, *rplB*, *rpoBC*, *fusA*, and *rpsC*) that distinguish *wMel* and *wMelCS* strains are used in the comparisons. Sequence names were marked with blue (strains used in current study), red (classic *wMel* strain), and black (*wMelCS* and *wMelPop* strains).

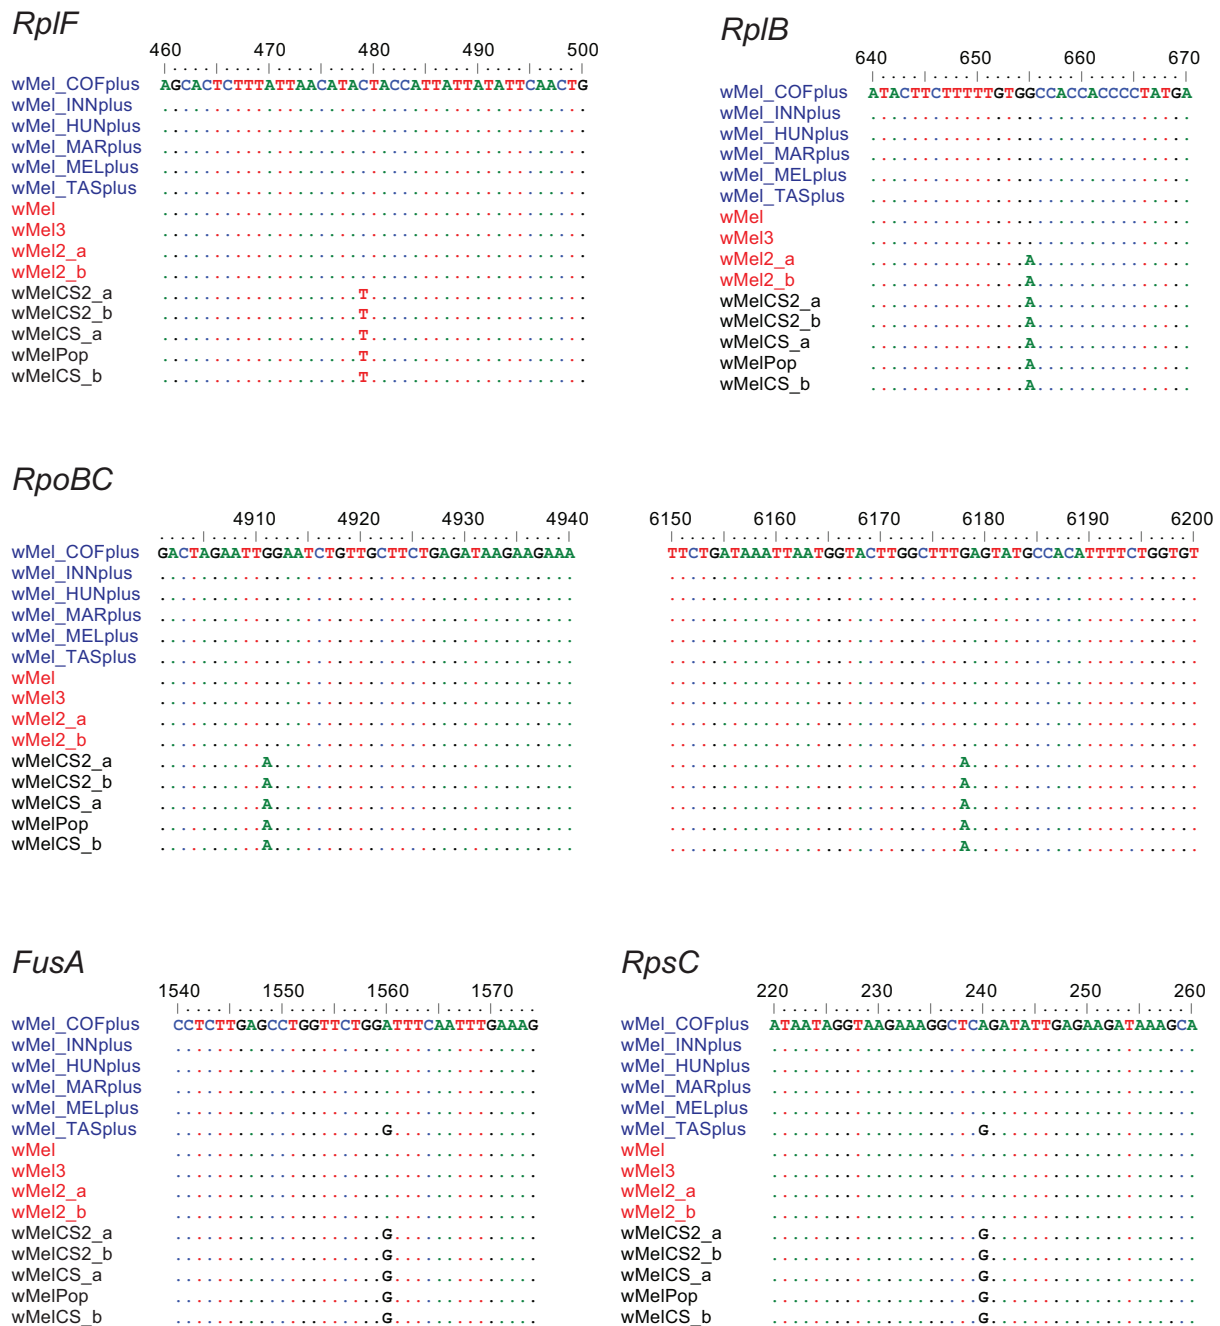

**Table S1.** Information on each RNA sequencing pool/library.

| <b>Pool/Library</b> | <b>Location</b> | <b>No. of individuals</b> | <b><i>Wolbachia</i> status</b> | <b>Filial status</b> | <b>RNA quality (RIN values)</b> | <b>Sequencing output (No. of bases)</b> |
|---------------------|-----------------|---------------------------|--------------------------------|----------------------|---------------------------------|-----------------------------------------|
| <b>INN-</b>         | Innisfail       | 10                        | negative                       | F1                   | 8.2                             | 5,095,044,600                           |
| <b>INN+</b>         | Innisfail       | 10                        | wMel positive                  | F1                   | 9.1                             | 5,216,261,400                           |
| <b>MAR-</b>         | Maryborough     | 10                        | negative                       | F1                   | 8.6                             | 5,398,528,000                           |
| <b>MAR+</b>         | Maryborough     | 10                        | wMel positive                  | F1                   | 8.7                             | 5,159,536,000                           |
| <b>COF-</b>         | Coffs Harbour   | 10                        | negative                       | F1                   | 8.7                             | 4,572,119,600                           |
| <b>COF+</b>         | Coffs Harbour   | 10                        | wMel positive                  | F1                   | 7.9                             | 5,359,641,200                           |
| <b>HUN-</b>         | Hunter Valley   | 10                        | negative                       | F1                   | 8.3                             | 5,265,708,400                           |
| <b>HUN+</b>         | Hunter Valley   | 10                        | wMel positive                  | F1                   | 8.7                             | 4,923,192,400                           |
| <b>MEL-</b>         | Melbourne       | 12                        | negative                       | F1                   | 8.4                             | 5,286,977,600                           |
| <b>MEL+</b>         | Melbourne       | 10                        | wMel positive                  | F1                   | 8.3                             | 5,008,758,400                           |
| <b>TAS-</b>         | Tasmania        | 10                        | negative                       | F3                   | 8.3                             | 4,921,892,800                           |
| <b>TAS+</b>         | Tasmania        | 10                        | wMel positive                  | F3                   | 7.7                             | 4,851,886,200                           |

**Table S2.** The presence and abundance of virus, bacteria (*Wolbachia*), and host genes in individual flies (% total non-rRNA reads) (See excel file).

**Table S3.** Raw *Drosophila* and *wMel* Cp density values for samples from 6 different locations in Australia. (See excel file).

**Table S4.** Comparisons of the mean density of *w*Mel *Wolbachia* and virome abundance for *wol*+ samples from the different locations.

| <b>Location</b> | <b>Mean*</b> | <b>N</b> | <b>Standard Deviation</b> | <b>Virome abundance (% non-ribosomal RNA)</b> |
|-----------------|--------------|----------|---------------------------|-----------------------------------------------|
| Coffs Harbour   | 0.55         | 10       | 0.833                     | 0.388                                         |
| Hunter Valley   | 1.93         | 10       | 1.509                     | 5.392                                         |
| Innisfail       | 1.25         | 10       | 0.791                     | 8.940                                         |
| Maryborough     | 0.47         | 10       | 1.460                     | 29.543                                        |
| Melbourne       | 2.45         | 10       | 1.076                     | 0.708                                         |
| Tasmania        | 1.43         | 10       | 1.337                     | 0.002                                         |
| Overall         | 1.35         | 60       | 1.352                     | 0.388                                         |

\*Computed as the signed difference between Cp values for *w*Mel and control gene

**Table S5.** Comparisons of *Wolbachia* density and virome abundance in individual *D. melanogaster* from the Melbourne population.

| <b>Sample ID</b> | <b>Cp value<br/>(Dros RpL40)</b> | <b>Cp value<br/>(wMel)</b> | <b>Density value<br/>(Dros - wMel Cp)</b> | <b>Virome abundance<br/>(% non-ribosomal RNA)</b> |
|------------------|----------------------------------|----------------------------|-------------------------------------------|---------------------------------------------------|
| 163              | 26.63                            | 24.15                      | 2.48                                      | 3.18                                              |
| 164              | 26.28                            | 24.94                      | 1.34                                      | 1.62                                              |
| 165              | 27.11                            | 23.9                       | 3.21                                      | 82.65                                             |
| 166              | 26.62                            | 24.23                      | 2.39                                      | 51.92                                             |
| 181              | 26.85                            | 24.06                      | 2.79                                      | 44.11                                             |
| 182              | 26.56                            | 24.12                      | 2.44                                      | 0.01                                              |
| 187              | 28.02                            | 25.79                      | 2.23                                      | 12.78                                             |
| 188              | 26.79                            | 24.97                      | 1.82                                      | 6.81                                              |
| 195              | 26.32                            | 24.18                      | 2.14                                      | 26.58                                             |
| 196              | 26.64                            | 23.79                      | 2.85                                      | 21.61                                             |
| 197              | 26.98                            | 25.02                      | 1.96                                      | 0.00                                              |
| 198              | 27.3                             | 24.34                      | 2.96                                      | 0.00                                              |
| 201              | 26.25                            | 23.63                      | 2.62                                      | 0.03                                              |
| 202              | 26.63                            | 23.95                      | 2.68                                      | 0.02                                              |
| 205              | 26.61                            | 23.02                      | 3.59                                      | 1.26                                              |
| 206              | 27.28                            | 23.18                      | 4.1                                       | 0.37                                              |
| 209              | 26.51                            | 23.81                      | 2.7                                       | 0.01                                              |
| 210              | 26.78                            | 24.56                      | 2.22                                      | 0.00                                              |
| 213              | 26.73                            | 23.35                      | 3.38                                      | 0.01                                              |
| 214              | 27.47                            | 24.83                      | 2.64                                      | 0.03                                              |
